# Supplementary material for: The Association of Calcium Signaling Pathway Gene Variants, Bone Mineral Density and Mild Cognitive Impairment in Elderly People
Source: MDPI journal article supplement (doi:10.3390/genes14040828), 2023-03-30
Supplement: s1 [file s1]

**Supplementary Table S1 SNP information for this study.**

| Gene    | SNP        | Chr: position  | Variant type                  | Alleles(major/min or) |
|---------|------------|----------------|-------------------------------|-----------------------|
| ATG12   | rs1058600  | chr5:115831016 | Non Coding Transcript Variant | C/T                   |
| ATG12   | rs26537    | chr5:115841317 | Intron Variant                | T/C                   |
| BCL11B  | rs1152781  | chr14:99172933 | 3 Prime UTR Variant           | T/G                   |
| BCL11B  | rs1152783  | chr14:99176023 | Synonymous Variant            | C/G                   |
| CACNA1C | rs1006737  | chr12:2236129  | Intron Variant                | G/A                   |
| CACNA1C | rs1051375  | chr12:2679713  | Synonymous Variant            | G/A                   |
| CACNA1C | rs215976   | chr12:2585472  | Missense Variant              | C/T                   |
| CACNA1C | rs216008   | chr12:2611971  | Synonymous Variant            | C/T                   |
| CACNA1C | rs2470425  | chr12:1968731  | 2KB Upstream Variant          | C/G                   |
| CACNA1C | rs58619945 | chr12:2051659  | Intron Variant                | G/A                   |
| CACNA1C | rs723672   | chr12:2052395  | Intron Variant                | T/C                   |
| CACNA1C | rs4765868  | chr12:1970159  | 5 Prime UTR Variant           | C/G                   |
| CCKAR   | rs17846984 | chr4:26481586  | 3 Prime UTR Variant           | C/T                   |
| CCKAR   | rs1800857  | chr4:26489489  | Intron Variant                | A/G                   |
| CCKAR   | rs1800908  | chr4:26490600  | 2KB Upstream Variant          | C/A                   |
| CCKAR   | rs2725301  | chr4:26483007  | Intron Variant                | A/G                   |
| CCKAR   | rs2854038  | chr4:26491587  | 2KB Upstream Variant          | A/G                   |
| CCKAR   | rs6448456  | chr4:26490352  | 5 Prime UTR Variant           | G/C                   |
| CCKAR   | rs1799723  | chr4:26490553  | 2KB Upstream Variant          | T/C                   |
| CCKAR   | rs1800855  | chr4:26489495  | Intron Variant                | T/A                   |
| NR3C1   | rs10052957 | chr5:143407136 | Intron Variant                | G/A                   |
| NR3C1   | rs12655166 | chr5:143429707 | Intron Variant                | T/C                   |
| NR3C1   | rs258751   | chr5:143282715 | Missense Variant              | G/A                   |
| NR3C1   | rs33388    | chr5:143317730 | Intron Variant                | T/A                   |
| NR3C1   | rs41400245 | chr5:143436433 | 2KB Upstream Variant          | C/T                   |
| NR3C1   | rs41423247 | chr5:143399010 | Intron Variant                | G/C                   |
| NR3C1   | rs61757411 | chr5:143437459 | 2KB Upstream Variant          | G/T                   |
| NR3C1   | rs6191     | chr5:143278591 | Non Coding Transcript Variant | A/C                   |
| NR3C1   | rs6196     | chr5:143281925 | Synonymous Variant            | A/G                   |
| NR3C1   | rs6877893  | chr5:143347628 | Intron Variant                | A/G                   |
| PRKCA   | rs1005651  | chr17:66441893 | Intron Variant                | A/C                   |
| PRKCA   | rs11079657 | chr17:66435948 | Intron Variant                | G/A                   |
| PRKCA   | rs2227857  | chr17:66688960 | Synonymous Variant            | G/A                   |
| PRKCA   | rs2228945  | chr17:66788904 | Synonymous Variant            | G/A                   |
| PRKCA   | rs2286674  | chr17:66804434 | 3 Prime UTR Variant           | A/G                   |
| PRKCA   | rs228883   | chr17:66447877 | Intron Variant                | C/T                   |
| PRKCA   | rs61687889 | chr17:66756394 | Intron Variant                | A/G                   |

|       |            |                |                         |     |
|-------|------------|----------------|-------------------------|-----|
| PRKCA | rs7220996  | chr17:66808582 | 3 Prime UTR Variant     | G/A |
| PRKCA | rs7342847  | chr17:66806426 | 3 Prime UTR Variant     | T/C |
| PRKCA | rs7342969  | chr17:66806071 | 3 Prime UTR Variant     | A/G |
| PRKCA | rs9909004  | chr17:66310015 | Intron Variant          | C/T |
| PRKCA | rs3764401  | chr17:66301711 | 2KB Upstream Variant    | T/C |
| PRKCA | rs4790904  | chr17:66783036 | Intron Variant          | T/C |
| PRKCA | rs8464     | chr17:66810598 | 3 Prime UTR Variant     | C/A |
| RAC1  | rs10951982 | chr7:6382925   | Intron Variant          | G/A |
| RAC1  | rs12536544 | chr7:6396270   | Intron Variant          | A/G |
| RAC1  | rs12977    | chr7:6402802   | 3 Prime UTR Variant     | C/T |
| RAC1  | rs33999234 | chr7:6372756   | 2KB Upstream Variant    | A/G |
| RAC1  | rs4720672  | chr7:6404208   | 500B Downstream Variant | T/C |
| RAC1  | rs702482   | chr7:6380568   | Intron Variant          | A/T |
| RAC1  | rs836478   | chr7:6392059   | Intron Variant          | T/C |
| RAC1  | rs9374     | chr7:6402740   | 3 Prime UTR Variant     | G/A |
| TRPM1 | rs11070718 | chr15:31001251 | 3 Prime UTR Variant     | C/T |
| TRPM1 | rs11070811 | chr15:31101879 | Intron Variant          | C/T |
| TRPM1 | rs2241493  | chr15:31070149 | Missense Variant        | T/C |
| TRPM1 | rs28441327 | chr15:31103143 | Intron Variant          | C/T |
| TRPM1 | rs3784588  | chr15:31002451 | Missense Variant        | A/G |
| TRPM1 | rs3809578  | chr15:31102334 | Intron Variant          | C/T |

---
